# Supplementary material for: Integration of artificial intelligence in orthodontic diagnosis and treatment planning a PRISMA ScR guided scoping review
Source: Research Square preprint supplement (doi:10.21203/rs.3.rs-8641111/v1), 2026-02-16
Supplement: Supplementary file 1 [file 127b4506ffb8792b96b8899b.docx]

**PRISMA-ScR Checklist (Fillable Template)**

Use this table to record where each PRISMA-ScR item is reported in your manuscript. For the official checklist and explanation paper, see PRISMA and EQUATOR resources.

| Section | Item | PRISMA-ScR checklist item | Reported on (page/line) |
| --- | --- | --- | --- |
| TITLE | 1 | Identify the report as a scoping review. | p. 1 (Title) |
| ABSTRACT | 2 | Structured summary (background, objectives, eligibility criteria, sources of evidence, charting methods, results, conclusions). | p. 1 (Abstract) |
| INTRODUCTION | 3 | Rationale: describe why the review is needed in the context of what is already known. | p. 2 (Introduction) |
| INTRODUCTION | 4 | Objectives: provide an explicit statement of the questions and objectives, including key elements (e.g., population, concept, context). | p. 2 (Introduction—Objectives) |
| METHODS | 5 | Protocol and registration (if applicable). | p. 3 (Materials and Methods—Protocol and registration) |
| METHODS | 6 | Eligibility criteria: specify characteristics of sources of evidence and rationale. | p. 3 (Materials and Methods—Eligibility criteria) |
| METHODS | 7 | Information sources: describe all sources of evidence searched and date of last search. | p. 3 (Materials and Methods—Information sources) |
| METHODS | 8 | Search: present full search strategy for at least one database/source. | p. 3 (Materials and Methods—Search); Supplementary File S4 (Search Strategies) |
| METHODS | 9 | Selection of sources of evidence: describe screening and eligibility process. | p. 3 (Materials and Methods—Study selection) |
| METHODS | 10 | Data charting process: describe how data were charted and how discrepancies were resolved. | p. 3 (Materials and Methods—Data charting process) |
| METHODS | 11 | Data items: list and define variables for which data were sought. | p. 3 (Materials and Methods—Data items) |
| METHODS | 12 | Critical appraisal of individual sources of evidence (if done): describe methods used and rationale. | p. 3 (Materials and Methods—Critical appraisal); Supplementary Files S2 (QUADAS-2) and S3 (PROBAST) |
| METHODS | 13 | Synthesis of results: describe methods for handling and summarizing the charted data. | p. 3–4 (Materials and Methods—Synthesis approach) |
| RESULTS | 14 | Selection of sources of evidence: give numbers screened/assessed/included with reasons for exclusions, ideally with a flow diagram. | p. 4 (Results—Study selection); Figure 1 |
| RESULTS | 15 | Characteristics of sources of evidence: present characteristics for which data were charted and provide citations. | p. 4–6 (Results—Study characteristics); Table 1; Supplementary Overview (S1) |
| RESULTS | 16 | Critical appraisal within sources of evidence (if done): present the appraisal results. | p. 4 (Results—Risk of bias statement); Supplementary Files S2 and S3 |
| RESULTS | 17 | Results of individual sources of evidence: present relevant extracted/charted data. | p. 4–8 (Results—Task-specific findings); Table 1; Supplementary Overview (S1) |
| RESULTS | 18 | Synthesis of results: summarize charting results in relation to objectives/questions. | p. 4–9 (Results synthesis across domains) |
| DISCUSSION | 19 | Summary of evidence: summarize main results, including concepts/themes and evidence gaps. | p. 9–10 (Discussion—Summary and implications) |
| DISCUSSION | 20 | Limitations: discuss limitations of the scoping review process. | p. 10 (Discussion—Limitations and future directions) |
| DISCUSSION | 21 | Conclusions: provide interpretation and implications/future directions. | p. 10 (End of Discussion—Conclusions) |
| FUNDING | 22 | Describe sources of funding for the included sources of evidence and for the scoping review, and the role of funders. | p. 15 (Declarations—Funding) |

Manuscript title: The Integration of Artificial Intelligence in Orthodontic Diagnosis and Treatment Planning: A PRISMA-ScR–Guided Scoping Review

Filled checklist prepared for submission (locations refer to section headings, tables, figures, and supplementary files).
