# Supplementary material for: Integration of artificial intelligence in orthodontic diagnosis and treatment planning a PRISMA ScR guided scoping review
Source: Research Square preprint supplement (doi:10.21203/rs.3.rs-8641111/v1), 2026-02-16
Supplement: Supplementary file 2 [file 22292af64e5f910cf021bc49.docx]

# QUADAS-2 Risk-of-Bias Assessment (Included Studies)

Supplementary File S2. QUADAS-2 Risk of Bias Assessment

This table summarizes the QUADAS-2 assessments for included diagnostic accuracy studies. Domains assessed include patient selection, index test, reference standard, and flow/timing. Each domain is rated as Low, High, or Unclear risk of bias.

Supplementary File S2. QUADAS-2 Risk of Bias Assessment (Pre-populated)

Supplementary File S2. QUADAS-2 Risk of Bias Assessment
