# Supplementary material for: Integration of artificial intelligence in orthodontic diagnosis and treatment planning a PRISMA ScR guided scoping review
Source: Research Square preprint supplement (doi:10.21203/rs.3.rs-8641111/v1), 2026-02-16
Supplement: Supplementary file 3 [file 22e80989f2bc01bcfea11282.docx]

# PROBAST Risk-of-Bias Assessment (Prediction Model Studies)

Supplementary File S3. PROBAST Assessment

This table provides the PROBAST evaluation for prediction model studies included in the review. Domains assessed include participants, predictors, outcomes, and analysis. Each domain is rated as Low, High, or Unclear risk of bias.

Supplementary File S4. Extracted Study Characteristics

This file includes the dataset of extracted study characteristics (authors, year, country, imaging modality, AI methods, sample size, performance metrics, and validation details). It is provided in tabular format for transparency and reproducibility.

Supplementary File S3. PROBAST Assessment

Supplementary File S3. PROBAST Assessment (Pre-populated)
