# Supplementary material for: Integration of artificial intelligence in orthodontic diagnosis and treatment planning a PRISMA ScR guided scoping review
Source: Research Square preprint supplement (doi:10.21203/rs.3.rs-8641111/v1), 2026-02-16
Supplement: Supplementary file 4 [file 631fdcfb7de73a9d127f0b00.docx]

# Table 1. Electronic Search Strategy for the Systematic Review

| Database | Search String / Strategy | Limits / Filters Applied | Date of Last Search |
| --- | --- | --- | --- |
| PubMed (MEDLINE) | ((“Artificial Intelligence”[MeSH Terms] OR “Machine Learning”[MeSH Terms] OR “Deep Learning”[MeSH Terms] OR “Convolutional Neural Network*”[Title/Abstract] OR “Neural Network*”[Title/Abstract]) AND (“Orthodontics”[MeSH Terms] OR “Cephalometry”[MeSH Terms] OR “Diagnosis, Computer-Assisted”[MeSH Terms] OR “Treatment Planning”[Title/Abstract] OR “Orthodontic Diagnosis”[Title/Abstract] OR “Cephalometric Analysis”[Title/Abstract] OR “Malocclusion Classification”[Title/Abstract] OR “Cone-Beam Computed Tomography”[Title/Abstract] OR CBCT[Title/Abstract]) AND (“Accuracy”[Title/Abstract] OR “Validation”[Title/Abstract] OR “Prediction”[Title/Abstract] OR “Decision Support”[Title/Abstract] OR “Treatment Outcome”[Title/Abstract] OR “Extraction Decision”[Title/Abstract] OR “Treatment Duration”[Title/Abstract])) AND (“2010/01/01”[Date – Publication] : “2025/12/31”[Date – Publication]) AND (english[Language]) NOT (Review[Publication Type]) | Year range 2010–2025; English only; exclude reviews | 15 September 2025 |
| Scopus (Elsevier) | TITLE-ABS-KEY("artificial intelligence" OR "machine learning" OR "deep learning" OR "convolutional neural network*" OR "neural network*") AND TITLE-ABS-KEY("orthodontics" OR "orthodontic diagnosis" OR "treatment planning" OR "cephalometric analysis" OR "cephalometrics" OR "malocclusion classification" OR "cone beam computed tomography" OR CBCT) AND TITLE-ABS-KEY("accuracy" OR "validation" OR "prediction" OR "decision support" OR "treatment outcome" OR "extraction decision" OR "treatment duration") AND PUBYEAR > 2009 AND PUBYEAR < 2026 AND (LIMIT-TO(LANGUAGE, "English")) AND (EXCLUDE(DOCTYPE, "re")) | 2010–2025; English; exclude reviews | 15 September 2025 |
| Web of Science (Core Collection) | TS=("artificial intelligence" OR "machine learning" OR "deep learning" OR "convolutional neural network*" OR "neural network*") AND TS=("orthodontics" OR "orthodontic diagnosis" OR "treatment planning" OR "cephalometric analysis" OR "cephalometrics" OR "malocclusion classification" OR "cone beam computed tomography" OR CBCT) AND TS=("accuracy" OR "validation" OR "prediction" OR "decision support" OR "treatment outcome" OR "extraction decision" OR "treatment duration") Refined by: LANGUAGE (English); Document Type (Article); Timespan (2010–2025) | 2010–2025; English; Articles only | 15 September 2025 |
| Google Scholar | “artificial intelligence” AND “orthodontics” AND (“diagnosis” OR “treatment planning” OR “cephalometrics” OR “CBCT”) AND (“machine learning” OR “deep learning” OR “neural network”) | Custom range 2010–2025; English results manually screened | 16 September 2025 |

Notes: All searches were performed between 15–16 September 2025 following PRISMA 2020 and PRISMA-AI guidelines. The protocol was registered in PROSPERO (CRD420251134644). Screening and data extraction were conducted by two independent reviewers.
